# Supplementary material for: Purine nucleosides replace cAMP in allosteric regulation of PKA in trypanosomatid pathogens
Source: eLife journal article supplement (doi:10.7554/elife.91040), 2023-11-20

Figure 6-figure supplement 1-source data 2: Original files for the Western Blot analysis (anti-His, anti PKAC1/2, anti PKAR) - labelled

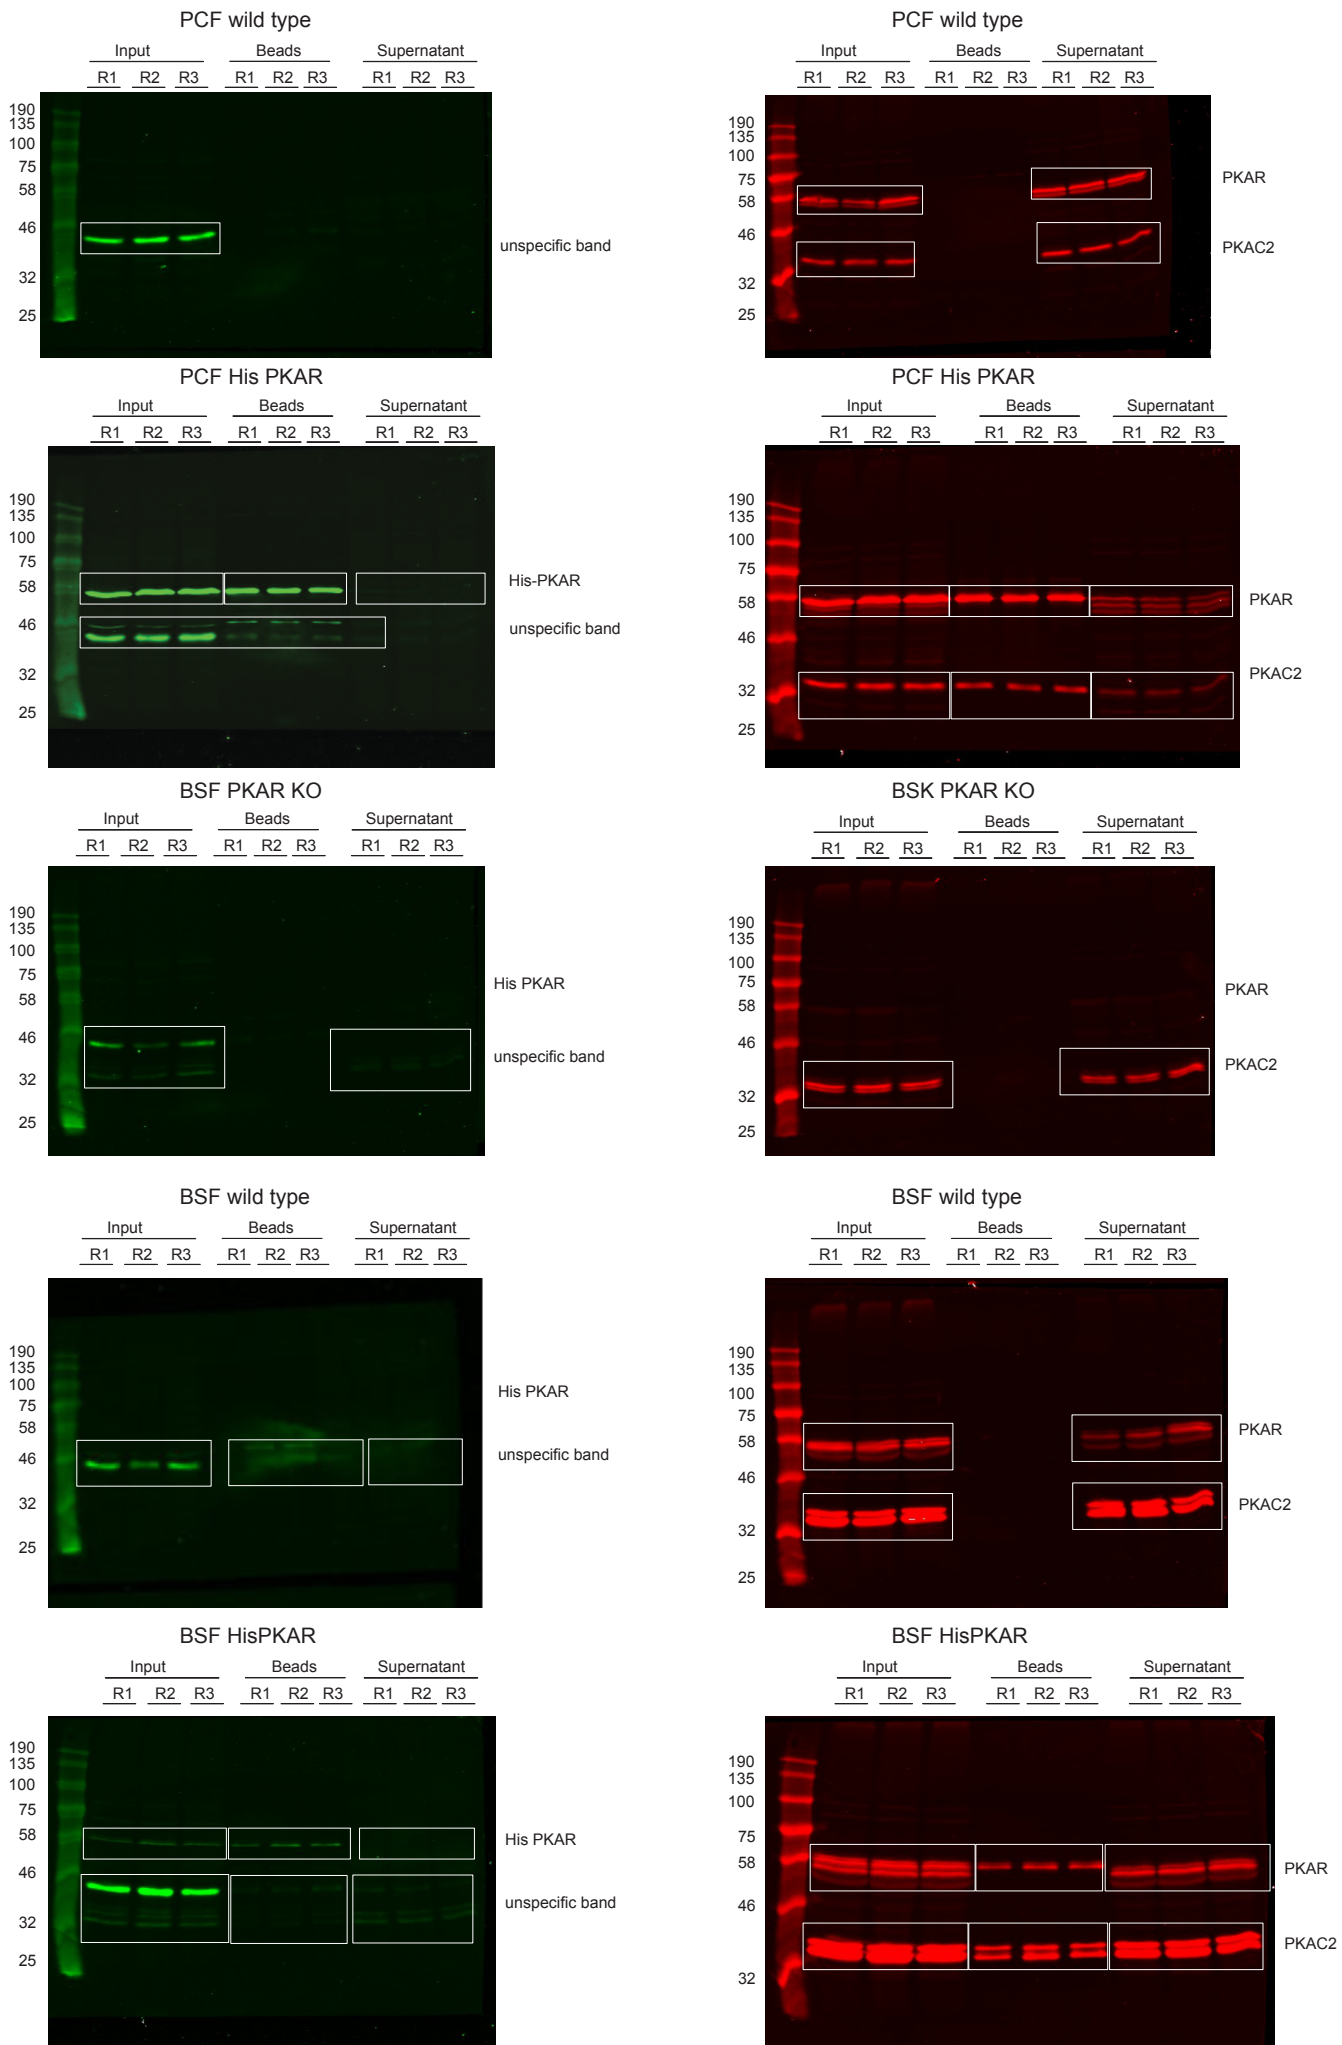

Supplement: fig6-figsupp1-data2 [file elife-91040-fig6-figsupp1-data2-v1.pdf]
