# Supplementary material for: Purine nucleosides replace cAMP in allosteric regulation of PKA in trypanosomatid pathogens
Source: eLife. 2024 Mar 22;12:RP91040. doi: 10.7554/eLife.91040 (PMC10959531; doi:10.7554/eLife.91040)
Supplement: Figure 1—figure supplement 1—source data 3. [file elife-91040-fig1-figsupp1-data3.xlsx]

## Sheet: Fig.1-fig. sup. 1-source data 2
Kinase Assays
T.brucei PKAR
cAMP
Run 1					Run 2					Run 3					Run 4
	Replicate 1	Replicate 2	Replicate 3			Replicate 1	Replicate 2	Replicate 3			Replicate 1	Replicate 2	Replicate 3			Replicate 1	Replicate 2	Replicate 3
log [cAMP] (µM)	U/ml	U/ml	U/ml		log [cAMP] (µM)	U/ml	U/ml	U/ml		log [cAMP] (mM)	U/ml	U/ml	U/ml		log [cAMP] (mM)	U/ml	U/ml	U/ml
3.69897	0.025	0.027	0.03		3.30103	0.089	0.093	0.104		0	0.18	0.21			0.69897	0.208	0.249
3.39794	0.037	0.031	0.039		3	0.112	0.117	0.107		-0.30103	0.19	0.16			-0.30103	0.314	0.334
3.09691	0.049	0.041	0.042		2.69897	0.121	0.121			-0.60206	0.16	0.17			-1.30103	0.334	0.353
2.79588	0.054	0.052	0.048		2.39794	0.121	0.114	0.133		-0.90309	0.17	0.16			-2.30103	0.358	0.376
2.49485	0.051	0.051	0.063		2.09691	0.127	0.124	0.124		-1.20412	0.15	0.17			-3.30103	0.379	0.395
2.19382	0.055	0.06	0.057		1.79588	0.127	0.128	0.119		-1.69897	0.14	0.17			-4	0.412	0.414
1.89279	0.061	0.058	0.058		1.49485	0.125	0.123	0.125
1.59176	0.058	0.059	0.063		1.19396		0.113	0.118
1.29073	0.069	0.062	0.063		0.892651	0.123	0.13	0.138
0.9897	0.062	0.061	0.059		0.592177	0.121	0.119	0.123
cGMP
Run 1					Run 2					Run 3					Run 4
	Replicate 1	Replicate 2	Replicate 3			Replicate 1	Replicate 2	Replicate 3			Replicate 1	Replicate 2	Replicate 3			Replicate 1	Replicate 2	Replicate 3
log [cGMP] (µM)	U/ml	U/ml	U/ml		log [cGMP] (µM)	U/ml	U/ml	U/ml		log [cGMP] (mM)	U/ml	U/ml	U/ml		log [cGMP] (µM)	U/ml	U/ml	U/ml
3.30103	0.625	0.693	0.7		3.30103	0.107	0.101	0.12		0.30103	1.77	1.74			3.69897
3	0.681	0.618	0.653		2.60206	0.075	0.091	0.08		0	1.58	1.72			3.39794	0.117	0.132	0.132
2.69897	0.48	0.489	0.522		1.90309	0.056	0.057	0.054		-0.30103	1.59	1.53			3.09691	0.128	0.145	0.138
2.39794	0.341	0.312	0.311		1.20412	0.05	0.051	0.058		-0.60206	1.24	1.31			2.79588	0.134	0.12	0.111
2.09691	0.23	0.214	0.197		0.50515	0.052	0.055	0.052		-0.90309	0.73	0.8			2.49485	0.094	0.096	0.097
1.79588	0.17	0.173	0.173		-0.19382	0.057	0.057	0.053		-1.20412	0.48	0.46			2.19382	0.087	0.083	0.085
1.49485	0.147	0.153	0.143		-0.886057	0.05	0.053	0.056		-1.69897	0.14	0.17			1.89279	0.074	0.084	0.085
1.19396	0.141	0.134	0.127		-1.52288	0.055	0.052	0.048							1.59176	0.069	0.085	0.078
0.892651	0.122	0.128	0.124												1.29073	0.084	0.075	0.081
0.592177	0.129	0.114	0.133												0.9897	0.071	0.078	0.082
cIMP
Run 1					Run 2					Run 3					Run 4
	Replicate 1	Replicate 2	Replicate 3			Replicate 1	Replicate 2	Replicate 3			Replicate 1	Replicate 2	Replicate 3			Replicate 1	Replicate 2	Replicate 3
log [cIMP] (µM)	U/ml	U/ml	U/ml		log [cIMP] (mM)	U/ml	U/ml	U/ml
3.69897	0.079	0.086	0.09		0.30103	0.17	0.18
3.39794	0.069	0.071	0.071		0	0.18	0.17
3.09691	0.067	0.066	0.071		-0.30103	0.16	0.17
2.79588	0.071	0.073	0.073		-0.60206	0.15	0.17
2.49485	0.061	0.061	0.069		-0.90309	0.15	0.15
2.19382	0.073	0.07	0.067		-1.20412	0.15	0.15
1.89279	0.068	0.072	0.064		-1.69897	0.14	0.17
1.59176	0.07	0.069	0.066
1.29073	0.074	0.077	0.069
0.9897	0.064	0.069	0.073
AMP
Run 1	Replicate1	Replicate2	Replicate3		Run 2					Run 3					Run 4
log [AMP] (µM)	U/ml	U/ml	U/ml		log [AMP] (µM)	U/ml	U/ml	U/ml
3.69897	0.04	0.042	0.052		3.69897	0.271	0.243
3.39794	0.054	0.049			2.69897	0.452	0.386
3.09691	0.049	0.056	0.053		1.69897	0.391	0.413
2.79588	0.063	0.057	0.062		0.69897	0.433	0.448
2.49485	0.07	0.065	0.065		-0.30103	0.416	0.433
2.19382	0.074	0.064	0.064		-1.30103	0.389	0.222
1.89282	0.058	0.073	0.064
1.59173	0.075	0.074	0.067
1.2907	0.065	0.071	0.067
0.989895	0.066	0.073	0.07
GMP
Run 1	Replicate1	Replicate2	Replicate3		Run 2					Run 3					Run 4
log [GMP] (µM)	U/ml	U/ml	U/ml
3.69897	0.215	0.206	0.199
3.39794	0.197	0.22	0.216
3.09691	0.143	0.147	0.17
2.79588	0.126	0.114	0.125
2.49485	0.099	0.09	0.095
2.19382	0.091	0.089	0.082
1.89282	0.081	0.087	0.087
1.59173	0.083	0.087	0.079
1.2907	0.075	0.07	0.077
0.989895	0.082	0.086	0.08
IMP
Run 1	Replicate1	Replicate2	Replicate3		Run 2					Run 3					Run 4
log [IMP] (µM)	U/ml	U/ml	U/ml		log [IMP]	U/ml	U/ml	U/ml		log [IMP]	U/ml	U/ml	U/ml		log [IMP]	U/ml	U/ml	U/ml
3.69897	0.224	0.226	0.221
3.39794	0.245	0.267	0.234
3.09691	0.236	0.253	0.26
2.79588	0.245	0.251	0.257
2.49485	0.244	0.206	0.25
2.19382	0.182	0.189	0.178
1.89282	0.144	0.125	0.128
1.59173	0.13	0.102	0.103
1.2907	0.074	0.076	0.081
0.989895	0.08	0.072	0.075
2'deoxyadenosine
Run 1	Replicate1	Replicate2	Replicate3		Run 2					Run 3					Run 4
log [2'deoxyadensoine] (µM)	U/ml	U/ml	U/ml		log [2'deoxyadensoine] (µM)	U/ml	U/ml	U/ml		log [2'deoxyadensoine] (µM)	U/ml	U/ml	U/ml		log [2'deoxyadensoine]	U/ml	U/ml	U/ml
3.69897	0.01	0.009	0.01		2.69897	0.09	0.07			2	0.04	0.04
3.22185	0.019	0.017	0.022		2.09691	0.05	0.05			1	0.05	0.04
2.74473	0.035	0.029	0.032		1.49485	0.05	0.06			0	0.04	0.04
2.26762	0.054	0.043	0.052		0.892651	0.05	0.06			-1	0.05	0.05
1.7905	0.055	0.062	0.067		0.290035	0.06	0.05			-2	0.05	0.04
1.31345	0.067	0.056	0.078		-0.309804	0.05	0.05			-3	0.04	0.04
0.836324	0.072	0.073	0.076		-0.920819	0.05	0.05
0.359835	0.076	0.073	0.082		-1.52288	0.05	0.05
-0.119186	0.076	0.074	0.079		-2	0.05	0.05
-0.60206	0.077	0.081	0.072
3'deoxyadenosine
Run 1	Replicate1	Replicate2	Replicate3		Run 2					Run 3					Run 4
log [3'deoxyadensoine] (µM)	U/ml	U/ml	U/ml		log [3'deoxyadensoine] (µM)	U/ml	U/ml	U/ml		log [3'deoxyadensoine] (µM)	U/ml	U/ml	U/ml		log [3'deoxyadensoine]	U/ml	U/ml	U/ml
3.69897	0.01	0.011	0.01		2.69897	0.06	0.07			2	0.08	0.11
3.22185	0.02	0.019	0.02		2.09691	0.05	0.05			1	0.05	0.04
2.74473	0.036	0.031	0.032		1.49485	0.05	0.05			0	0.05	0.04
2.26762	0.051	0.052	0.047		0.892651	0.05	0.05			-1	0.04	0.04
1.7905	0.062	0.061	0.063		0.290035	0.04	0.05			-2	0.04	0.04
1.31345	0.068	0.077	0.075		-0.309804	0.04	0.04			-3	0.04	0.04
0.836324	0.071	0.083	0.076		-0.920819	0.04	0.04
0.359835	0.076	0.073	0.078		-1.52288	0.04	0.04
-0.119186	0.073	0.078	0.069		-2	0.04	0.04
-0.60206	0.075	0.083	0.082
5'deoxyadenosine
Run 1	Replicate1	Replicate2	Replicate3		Run 2					Run 3					Run 4
log [5'deoxyadensoine] (µM)	U/ml	U/ml	U/ml		log [5'deoxyadensoine] (µM)	U/ml	U/ml	U/ml
3.69897	0.021	0.023	0.024		2	0.08	0.1
3.22185	0.048	0.044	0.044		1	0.04	0.05
2.74473	0.065	0.07	0.063		0	0.04	0.05
2.26762	0.067	0.088	0.087		-1	0.04	0.04
1.7905	0.086	0.076	0.085		-2	0.04	0.03
1.31345	0.072	0.078	0.081		-3	0.04	0.04
0.836324	0.085	0.074	0.069
0.359835	0.077	0.075	0.08
-0.119186	0.073	0.081	0.082
-0.60206	0.072	0.074	0.073
Nebularine
Run 1	Replicate1	Replicate2	Replicate3		Run 2	Replicate1	Replicate2	Replicate3		Run 3	Replicate1	Replicate2	Replicate3
log [Nebularine] (µM)	U/ml	U/ml	U/ml		log [Nebularine] (µM)	U/ml	U/ml	U/ml		log [Nebularine] (µM)	U/ml	U/ml	U/ml
2	0.14	0.13			1.47712	0.29	0.29			2	0.127	0.126	0.137
1	0.14	0.09			1	0.25	0.26			1.52287	0.118	0.127	0.13
0	0.03	0.04			0.522835	0.17	0.19			1.04575	0.116	0.116	0.113
-1	0.02	0.02			0.0457141	0.12	0.12			0.568671	0.079	0.085	0.079
-2	0.02	0.02			-0.431798		0.06			0.091667	0.068	0.052	0.062
-3	0.02	0.02			-0.910095	0.03	0.03			-0.385103	0.03	0.033	0.035
-4	0.01	0.01								-0.863279	0.025	0.025	0.024
										-1.33724	0.019	0.022	0.021
										-1.82391	0.018	0.022	0.018
										-2.30103	0.02	0.021	0.019
Allopurinol Riboside
Run 1	Replicate1	Replicate2	Replicate3		Run 2	Replicate1	Replicate2	Replicate3		Run 3					Run 4
log [Allopurinol riboside] (µM)	U/ml	U/ml	U/ml		log [Allopurinol riboside] (µM)	U/ml	U/ml	U/ml
3	0.2	0.21			2	0.405	0.399
2	0.18	0.18			1.69897	0.379	0.419	0.46
1	0.19	0.18			1.39794	0.421	0.387	0.393
0	0.07	0.08			1.09691	0.425	0.418	0.43
-1	0.03	0.04			0.79588	0.4	0.385	0.37
-2	0.03	0.04			0.49485	0.348	0.325	0.338
					0.19382	0.246	0.25	0.236
					-0.10721	0.154	0.15	0.157
					-0.40824	0.109	0.118	0.111
					-0.70927	0.106	0.102	0.102
Xanthosine
Run 1	Replicate1	Replicate2	Replicate3		Run 2	Replicate1	Replicate2	Replicate3
log [Xanthosine] (µM)	U/ml	U/ml	U/ml		log [Xanthosine] (µM)	U/ml	U/ml	U/ml
3	0.14				3	0.385	0.385	0.383
2	0.11	0.13			2.69897	0.404	0.4	0.386
1	0.05	0.05			2.39794	0.392	0.419	0.423
0	0.03	0.03			2.09691	0.348	0.362	0.393
-1	0.03	0.03			1.79588	0.233	0.217	0.235
-2	0.03	0.04			1.49485	0.219	0.178	0.169
					1.19382	0.144	0.134	0.131
					0.89279	0.118	0.128	0.115
					0.59176	0.107	0.094	0.099
					0.29073	0.09	0.098	0.098
Uridine
Run 1	Replicate1	Replicate2	Replicate3		Run 2	Replicate1	Replicate2	Replicate3
log [Urdine] (µM)	U/ml	U/ml	U/ml		log [Uridine] (µM)	U/ml	U/ml	U/ml
3	0.395	0.37	0.393		2	0.16	0.17
2.69897		0.422	0.405		1.39794	0.14	0.14
2.39794	0.41	0.381	0.409		0.79588	0.11	0.12
2.09691	0.39	0.336	0.336		0.193959		0.12
1.79588	0.33	0.32	0.281		-0.407823	0.11	0.13
1.49485	0.209	0.211	0.206		-1.00877	0.11	0.12
1.19382	0.154	0.138	0.163		-1.61979	0.12	0.11
0.89279	0.123	0.121	0.127		-2.69897	0.09	0.09
0.59176	0.108	0.1	0.096
0.29073	0.092	0.092	0.092
Cytidine
Run 1	Replicate1	Replicate2	Replicate3		Run 2	Replicate1	Replicate2	Replicate3		Run 3	Replicate1	Replicate2	Replicate3		Run 4	Replicate1	Replicate2	Replicate3
log [cytidine] (µM)	U/ml	U/ml	U/ml		log [adeno]	U/ml	U/ml	U/ml		log [adeno]	U/ml	U/ml	U/ml		log [adeno]	U/ml	U/ml	U/ml
3	0.121	0.124	0.132
2.69897	0.102	0.123	0.118
2.39794	0.091	0.098	0.098
2.09691	0.092	0.075	0.073
1.79588	0.086	0.08	0.085
1.49485	0.067	0.073	0.07
1.19382	0.072	0.067	0.09
0.89279	0.072	0.073	0.072
0.59176	0.067	0.079	0.072
0.29073	0.073	0.071	0.076
