# Supplementary material for: Purine nucleosides replace cAMP in allosteric regulation of PKA in trypanosomatid pathogens
Source: eLife. 2024 Mar 22;12:RP91040. doi: 10.7554/eLife.91040 (PMC10959531; doi:10.7554/eLife.91040)
Supplement: Figure 1—figure supplement 1—source data 4. [file elife-91040-fig1-figsupp1-data4.xlsx]

## Sheet: Fig.1-fig. sup. 1-source data 3
Kinase Assays
L.donovani PKA
Guanosine					Guanosine
					Run 2
Run 1	Replicate1	Replicate2	Replicate3			Replicate1	Replicate2	Replicate3
log [guano] (µM)	U/ml	U/ml	U/ml		log [guano] (µM)	U/ml	U/ml	U/ml
1.69897	0.784	0.726	0.725		1.30103	1.903	1.8	2.354
1.39794	0.819	0.763	0.742		0.69897	1.36	1.357	1.56
1.09691	0.794	0.791	0.78		0.09691	0.888	0.772	0.796
0.79588	0.75	0.724	0.851		-0.50515	0.584	0.603	0.527
0.49485	0.672	0.655	0.649		-1.10721	0.597	0.579	0.58
0.193959	0.567	0.515	0.585		-1.70927	0.574	0.572	0.529
-0.107349	0.459	0.448	0.462		-2.31133	0.606	0.53	0.615
-0.407823	0.404	0.416	0.393		-2.91339	0.626	0.594	0.631
-0.709965	0.37	0.377	0.365		-3.51545	0.539	0.561	0.534
-1.00877	0.364	0.368	0.367
Adenosine					Adenosine
					Run 2
Run 1	Replicate1	Replicate2	Replicate3			Replicate1	Replicate2	Replicate3
log [adeno] (µM)	U/ml	U/ml	U/ml		log [adeno] (µM)	U/ml	U/ml	U/ml
2	0.559	0.61			2.30103	1.141	1.348	1.353
1.69897	0.614	0.626	0.636		1.69897	1.265	1.561	1.308
1.39794	0.566	0.623	0.621		1.09691	0.984	1.699	1.02
1.09691	0.578	0.56	0.585		0.49485	0.734	0.669	0.713
0.79588	0.505	0.501	0.477		-0.10721	0.609	0.657	0.646
0.49485	0.392	0.406	0.374		-0.70927	0.567	0.607	0.828
0.193959	0.391	0.402	0.38		-1.31133	0.674	0.661	0.587
-0.107349	0.386	0.392	0.399		-1.91339	0.57	0.608	0.6
-0.407823	0.394	0.379	0.374		-2.51545	0.603	0.598	0.563
