# Supplementary material for: Purine nucleosides replace cAMP in allosteric regulation of PKA in trypanosomatid pathogens
Source: eLife. 2024 Mar 22;12:RP91040. doi: 10.7554/eLife.91040 (PMC10959531; doi:10.7554/eLife.91040)
Supplement: Figure 1—figure supplement 1—source data 5. [file elife-91040-fig1-figsupp1-data5.xlsx]

## Sheet: Fig.1-fig. sup.1-source data 4
Kinase Assays
T. cruzi PKA
Guanosine					Guanosine
					Run 2
Run 1	Replicate1	Replicate2	Replicate3			Replicate1	Replicate2	Replicate3
log [guanosine] (µM)	U/ml	U/ml	U/ml		log [guanosine] (µM)	U/ml	U/ml	U/ml
1.69897		1.755	1.964		2.30103	10.825	14.862	13.982
1.39794	1.621	1.658	1.686		1.69897	13.897	14.565	12.863
1.09691	1.624	1.554	1.728		1.09691	10.913	9.795	10.75
0.79588	1.427	1.383	1.36		0.49485	5.563	5.591	5.141
0.49485	1.246	1.15	1.08		-0.10721	2.446	2.312	2.353
0.193959	0.714	0.845	0.837		-0.70927	1.811	1.752	1.688
-0.107349	0.747	0.643	0.711		-1.31133	1.628	1.583	1.609
-0.407823	0.606	0.523	0.518		-1.91339	1.466	1.663	1.65
-0.709965	0.555	0.571	0.598		-2.51545	1.583	1.666	1.444
-1.00877	0.468	0.494	0.477
Adenosine					Adenosine
					Run 2
Run 1	Replicate1	Replicate2	Replicate3			Replicate1	Replicate2	Replicate3
log [Adenosine] (µM)	U/ml	U/ml	U/ml		log [Adenosine] (µM)	U/ml	U/ml	U/ml
2.69897		2.124	2.463		3	7.059	7.769	7.389
2.22185	2.585	2.724	2.936		2.39794	8.355	9.9	10.422
1.74473	2.464	3.022	2.873		1.79588	8.447	8.304	9.118
1.26762	2.26	2.041	2.31		1.19382	6.193	5.42	5.7
0.790496	1.586	1.646	1.663		0.59176	3.644	3.209	3.49
0.313445	1.366	1.323	1.48		-0.0103	2.479	2.288	2.193
-0.163676	1.129	1.209	1.182		-0.61236	2.03	2.003	1.902
-0.640165	1.012	1.003	0.979		-1.21442	1.728	1.84	1.817
-1.11919	1.053	1.114	1.007		-1.81648	1.625	1.72	1.64
-1.60206	1.06	1.002	0.953
