# Supplementary material for: Purine nucleosides replace cAMP in allosteric regulation of PKA in trypanosomatid pathogens
Source: eLife. 2024 Mar 22;12:RP91040. doi: 10.7554/eLife.91040 (PMC10959531; doi:10.7554/eLife.91040)
Supplement: Figure 1—figure supplement 1—source data 6. [file elife-91040-fig1-figsupp1-data6.xlsx]

## Sheet: Fig.1-fig. sup.1-source data 5
	Isothermal Titration Calorimetry (ITC)
	Homo sapiens PKARI-a full size (1-381)											L.donovani PKAR
			Filename		KD (nM)	∆H (kcal/mol)	∆G (kcal/mol)	-T∆S (kcal/mol)	N (sites)
			cAMP Run 1		8.41	-20.7	-11	9.63	1.27
			cAMP Run 2		38.1	-17.8	-10.1	7.68	1.38			cAMP Run 1			cAMP Run 2			cAMP Run 3
			cAMP Run 3		21.8	-23.5	-10.5	13	2.06
		AVERAGE			22.77	-20.6667	-10.5333	10.1033	1.57
		SDEV			14.8687	2.85015	0.450925	2.6914	0.427902
		FINAL VALUE			23 ± 15	-21 ± 3	-10,5 ± 0,5	10 ± 3	1,6 ± 0,4
	cAMP Run 1			cAMP Run 2			cAMP Run 3
