# Supplementary material for: Purine nucleosides replace cAMP in allosteric regulation of PKA in trypanosomatid pathogens
Source: eLife. 2024 Mar 22;12:RP91040. doi: 10.7554/eLife.91040 (PMC10959531; doi:10.7554/eLife.91040)
Supplement: Figure 1—source data 1. [file elife-91040-fig1-data1.xlsx]

## Sheet: Figure 1-source data 1
Kinase Assays
T.brucei PKAR
Inosine
Run 1					Run 2					Run 3					Run 4
	Replicate 1	Replicate 2	Replicate 3			Replicate 1	Replicate 2	Replicate 3			Replicate 1	Replicate 2	Replicate 3			Replicate 1	Replicate 2	Replicate 3
log [ino] (µM)	U/ml	U/ml	U/ml		log [ino](µM)	U/ml	U/ml	U/ml		log [ino](µM)	U/ml	U/ml	U/ml		log [ino](µM)	U/ml	U/ml	U/ml
-1	0.138	0.145	0.135		0	21.84				1.60206	0.17	0.16			-0.522879	0.4	0.34
-1.30103	0.123	0.136	0.13		-0.30103	23.74	21.71			0.60206	0.14	0.15			-1	0.37
-1.60206	0.113	0.111	0.107		-0.60206	22.68	18.26			-0.39794	0.14	0.15			-1.48149	0.25	0.29
-1.90309	0.066	0.084	0.071		-0.90309	20.56	20.66			-1.39794	0.12	0.12			-1.95861	0.12	0.13
-2.20066	0.048	0.044	0.041		-1.20412	17.4	18.55			-2.39794	0.03	0.04			-2.39794	0.05	0.06
-2.50864	0.028	0.028	0.029		-1.50515	16.91	15.28			-3.39794	0.02	0.02			-3	0.03	0.03
-2.79588	0.022	0.022	0.024		-1.80618	12.51	13.76			-4.39794	0.02	0.02
-3.09691	0.022	0.021	0.023		-2.10721	10.91	9.32			-5.39794	0.02	0.02
-3.39794	0.021	0.022	0.019		-2.40824	9	8.3
-3.69897	0.02	0.022	0.018
Guanosine
Run 1					Run 2					Run 3					Run 4
	Replicate 1	Replicate 2	Replicate 3			Replicate 1	Replicate 2	Replicate 3			Replicate 1	Replicate 2	Replicate 3			Replicate 1	Replicate 2	Replicate 3
log [guano] (µM)	U/ml	U/ml	U/ml		log [guano] (µM)	U/ml	U/ml	U/ml		log [guano] (µM)	U/ml	U/ml	U/ml		log [guano] (µM)	U/ml	U/ml	U/ml
0.69897	0.129	0.126	0.127		0.30103	0.032	0.036	0.037		0.477121	0.36	0.37			0	0.027	0.028	0.03
0.39794	0.122	0.132	0.118		0	0.037	0.041	0.037		0	0.31	0.35			-0.30103	0.03	0.029	0.032
0.09691	0.13	0.125	0.128		-0.30103	0.035	0.034	0.038		-0.477556	0.25	0.29			-0.60206	0.026	0.031	0.028
-0.200659	0.128	0.116	0.134		-0.60206	0.033	0.031	0.029		-0.954677	0.16	0.14			-0.90309	0.022	0.02	0.02
-0.508638	0.117	0.107	0.106		-0.90309	0.018	0.02	0.021		-1.4318	0.07	0.07			-1.20412	0.014	0.015	0.015
-0.79588	0.073	0.081	0.076		-1.20412	0.015	0.016	0.015		-1.92082	0.03	0.03			-1.50515	0.012	0.01	0.007
-1.09691	0.06	0.05	0.048		-1.50515	0.011	0.013	0.013							-1.80618	0.005	0.008	0.006
-1.39794	0.041	0.039	0.039		-1.80618	0.012	0.009	0.01							-2.10721	0.005	0.007	0.005
-1.69897	0.029	0.032	0.028		-2.10721	0.01	0.01	0.009							-2.40824	0.006	0.005	0.008
-2	0.029	0.024	0.025
Adenosine
Run 1					Run 2					Run 3					Run 4
	Replicate 1	Replicate 2	Replicate 3			Replicate 1	Replicate 2	Replicate 3			Replicate 1	Replicate 2	Replicate 3			Replicate 1	Replicate 2	Replicate 3
log [adeno] (µM)	U/ml	U/ml	U/ml		log [adeno ](µM)	U/ml	U/ml	U/ml		log [adeno] (µM)	U/ml	U/ml	U/ml		log [adeno] (µM)	U/ml	U/ml	U/ml
2	0.11	0.115	0.119		1.69897	0.032	0.034	0.034		1.77815	0.02	0.021	0.016		1.60206	0.031	0.033	0.032
1.69897	0.118	0.123	0.127		1.39794	0.033	0.037	0.036		1.30103	0.017	0.021	0.019		1.30103	0.038	0.038	0.04
1.39794	0.107	0.111	0.107		1.09691	0.033	0.029	0.03		0.824126	0.015	0.016	0.013		1	0.036	0.038
1.09691	0.088	0.091	0.096		0.79588	0.026	0.025	0.024		0.346353	0.011	0.011	0.011		0.69897	0.024	0.025	0.024
0.79588	0.065	0.063	0.07		0.49485	0.015	0.018	0.018		-0.130768	0.009	0.008	0.008		0.39794	0.025	0.022	0.021
0.49485	0.042	0.054	0.051		0.19382	0.013	0.016	0.015		-0.60206	0.009	0.007	0.007		0.09691	0.016	0.016	0.014
0.193959	0.041	0.04	0.038		-0.10721	0.014	0.015	0.011		-1.09691	0.008	0.009	0.008		-0.20412	0.014	0.014	0.014
-0.107349	0.025	0.026	0.036		-0.40824	0.011	0.013	0.011							-0.50515		0.014	0.014
-0.407823	0.024	0.023	0.026
-0.709965	0.024	0.023	0.02
