# Supplementary material for: Purine nucleosides replace cAMP in allosteric regulation of PKA in trypanosomatid pathogens
Source: eLife. 2024 Mar 22;12:RP91040. doi: 10.7554/eLife.91040 (PMC10959531; doi:10.7554/eLife.91040)
Supplement: Figure 1—source data 2. [file elife-91040-fig1-data2.xlsx]

## Sheet: Figure 1-source data 2
Kinase assays
			T. cruzi PKA
			Inosine
			Run 1					Run 2					Run 3					Run 4
				Replicate 1	Replicate 2	Replicate 3			Replicate 1	Replicate 2	Replicate 3			Replicate 1	Replicate 2	Replicate 3			Replicate 1	Replicate 2	Replicate 3
			log [ino] (µM)	U/ml	U/ml	U/ml		log [ino] (µM)	U/ml	U/ml	U/ml		log [ino]	U/ml	U/ml	U/ml		log [ino]	U/ml	U/ml	U/ml
			1	4.818	4.966	5.402		0	9.25	10.42
			0.522874	5.293	5.12	6.188		-0.69897	7.64	5.88
			0.0457531	4.906	5.284	4.744		-1.39794	2.67	2.86
			-0.431329	4.062	4.553	4.037		-2.09691	0.58	0.57
			-0.908333	3.113	3.277	3.243		-2.79588	0.33	0.46
			-1.3851	2.15	1.971	2.159		-3.52288	0.24	0.22
			-1.86328	1.742	1.696	1.648
			-2.33724	1.57	1.394	1.577
			-2.82391	1.467	1.457	1.414
			-3.30103	1.331	1.411	1.362
			cAMP
			Run 1					Run 2					Run 3					Run 4
				Replicate 1	Replicate 2	Replicate 3			Replicate 1	Replicate 2	Replicate 3			Replicate 1	Replicate 2	Replicate 3			Replicate 1	Replicate 2	Replicate 3
			log [cAMP] (µM)	U/ml	U/ml	U/ml		log [cAMP] (µM)	U/ml	U/ml	U/ml		log [cAMP]	U/ml	U/ml	U/ml		log [cAMP]	U/ml	U/ml	U/ml
			3.30103	0.867	0.926	0.97		3.69897	1.932	1.528	2.091
			2.60206	1.158	1.188	1.18		2.69897	1.672	1.485	1.532
			1.90309	1.327	1.432	1.287		1.69897	1.551	1.379	1.538
			1.20412	1.246	1.383	1.389		0.69897	1.482	1.504	1.525
			0.50515	1.389	1.386	1.294		-0.30103	1.604	1.623	1.684
			-0.19382	1.331	1.397	1.302		-1.30103	1.673	1.902	1.901
			-0.886057	1.325	1.305	1.243
			L.donovani PKA
			Inosine
			Run 1	Replicate 1	Replicate 2	Replicate 3		Run 2	Replicate 1	Replicate 2	Replicate 3		Run 3	Replicate 1	Replicate 2	Replicate 3		Run 4	Replicate 1	Replicate 2	Replicate 3
			log [ino] (µM)	U/ml	U/ml	U/ml		log [ino] (µM)	U/ml	U/ml	U/ml		log [ino]	U/ml	U/ml	U/ml		log [ino]	U/ml	U/ml	U/ml
			1	1.023	0.967	1.061		1	0.869	0.799	0.811
			0.522835	1.014	1.039	1.013		0.69897	0.835	0.789	0.934
			0.0457141	0.963	1.03	1.017		0.39794	0.663	0.847	0.923
			-0.431798		0.949	0.916		0.09691	0.771	0.734	0.794
			-0.910095	0.813	0.824	0.851		-0.200659	0.791	0.813	0.825
			-1.38722	0.698	0.671	0.729		-0.508638	0.747	0.824	0.759
			-1.85387	0.649	0.578	0.578		-0.79588	0.737	0.689	0.685
			-2.30103	0.479	0.498	0.528		-1.09691	0.647	0.609	0.625
			-2.69897	0.473	0.458	0.479		-1.39794	0.569	0.573	0.582
			-3	0.452	0.388	0.452		-1.69897	0.446	0.457	0.446
			cAMP
			Run 1	Replicate 1	Replicate 2	Replicate 3		Run 2	Replicate 1	Replicate 2	Replicate 3		Run 3	Replicate 1	Replicate 2	Replicate 3		Run 4	Replicate 1	Replicate 2	Replicate 3
			log [cAMP] (µM)	U/ml	U/ml	U/ml		log [cAMP] (µM)	U/ml	U/ml	U/ml		log [cAMP]	U/ml	U/ml	U/ml		log [cAMP]	U/ml	U/ml	U/ml
			3.69897	0.29	0.378	0.329		3.30103	0.428	0.459	0.471
			3.09691	0.481	0.449	0.452		2.60206	0.57	0.622	0.606
			2.49485	0.561	0.544	0.596		1.90309	0.633	0.549	0.686
			1.89279	0.571	0.581	0.559		1.20412	0.658	0.663	0.639
			1.29073	0.435	0.548	0.581		0.50515	0.64	0.654	0.604
			0.68867	0.601	0.62	0.572		-0.19382	0.636	0.631	0.638
			0.0866101	0.842	0.69	0.621		-0.886057	0.637	0.649	0.613
			-0.51545	0.608	0.604	0.624
			-1.11751	0.609	0.607	0.612
			Mammalian PKA (Human RIa/Mouse Ca)
			Inosine
			Run 1	Replicate 1	Replicate 2	Replicate 3		Run 2	Replicate 1	Replicate 2	Replicate 3		Run 3	Replicate 1	Replicate 2	Replicate 3		Run 4	Replicate 1	Replicate 2	Replicate 3
			log [ino] (µM)	U/ml	U/ml	U/ml		log [ino]	U/ml	U/ml	U/ml		log [ino]	U/ml	U/ml	U/ml		log [ino]	U/ml	U/ml	U/ml
			3.69897	0.006	0.006	0.008		1.69897	0.09	0.09
			3.09691	0.007	0.008	0.006		0.69897	0.06	0.07
			2.49485	0.007	0.007	0.007		-0.30103	0.07	0.06
			1.89279	0.006	0.008	0.009		-1.30103	0.06	0.07
			1.29073	0.007	0.009	0.011		-2.30103	0.06	0.07
			0.68867	0.011	0.008	0.01
			0.0866101	0.01	0.011	0.011
			-0.51545	0.01	0.008	0.011
			-1.11751	0.013	0.012	0.011
			Guanosine
			Run 1	Replicate 1	Replicate 2	Replicate 3		Run 2	Replicate 1	Replicate 2	Replicate 3		Run 3	Replicate 1	Replicate 2	Replicate 3		Run 4	Replicate 1	Replicate 2	Replicate 3
			log [guano] (µM)	U/ml	U/ml	U/ml		log [ino]	U/ml	U/ml	U/ml		log [ino]	U/ml	U/ml	U/ml		log [ino]	U/ml	U/ml	U/ml
			3.69897	0.013	0.013	0.013
			3.22185	0.014	0.017	0.015
			2.74473	0.017	0.015	0.019
			2.26762	0.019	0.021	0.021
			1.7905	0.022	0.02	0.018
			1.31345	0.019	0.022	0.022
			0.836324	0.022	0.023	0.025
			0.359835	0.023	0.021	0.025
			-0.119186	0.026	0.027	0.027
			Adenosine
			Run 1	Replicate 1	Replicate 2	Replicate 3		Run 2	Replicate 1	Replicate 2	Replicate 3		Run 3	Replicate 1	Replicate 2	Replicate 3		Run 4	Replicate 1	Replicate 2	Replicate 3
			log [adeno] (µM)	U/ml	U/ml	U/ml		log [ino]	U/ml	U/ml	U/ml		log [ino]	U/ml	U/ml	U/ml		log [ino]	U/ml	U/ml	U/ml
			3.69897	0.011	0.011	0.01
			3.09691	0.018	0.019	0.02
			2.49485	0.021	0.026	0.021
			1.89282	0.027	0.026	0.026
			1.2907	0.023	0.02	0.024
			0.68842	0.029	0.031	0.034
			0.0863598	0.03	0.03	0.031
			-0.508638	0.106	0.098	0.107
			-1.09691	0.033	0.028	0.027
			cAMP
			Run 1	Replicate 1	Replicate 2	Replicate 3		Run 2	Replicate 1	Replicate 2	Replicate 3		Run 3	Replicate 1	Replicate 2	Replicate 3		Run 4	Replicate 1	Replicate 2	Replicate 3
			log [cAMP] (µM)	U/ml	U/ml	U/ml		log [cAMP] (µM)	U/ml	U/ml			log [cAMP]	U/ml				log [cAMP]	U/ml
			1	0.095	0.1	0.113		1	1.283	1.042
			0.39794	0.104	0.101	0.111		0.69897	1.213	1.225
			-0.20412	0.102	0.107	0.123		0.39794	1.115	1.137
			-0.80618	0.084	0.099	0.087		0.09691	1.122	1.293
			-1.40824	0.046	0.039	0.043		-0.20412	1.341	1.231
			-2.0103	0.026	0.03	0.03		-0.50515	1.102	1.168
			-2.61236	0.026	0.025	0.023		-0.80618	1.155	1.178
			-3.21442	0.025	0.024	0.026		-1.10721	1.027	0.96
			-3.81648	0.024	0.02	0.024		-1.40824	0.453	0.459
								-1.70927	0.139	0.126
								-2.0103	0.076	0.056
								-2.31133	0.038	0.038
