# Supplementary material for: Purine nucleosides replace cAMP in allosteric regulation of PKA in trypanosomatid pathogens
Source: eLife. 2024 Mar 22;12:RP91040. doi: 10.7554/eLife.91040 (PMC10959531; doi:10.7554/eLife.91040)
Supplement: Figure 1—source data 3. [file elife-91040-fig1-data3.xlsx]

## Sheet: Figure 1-source data 3
	Isothermal Titration Calorimetry (ITC)
	T.brucei PKAR
			Filename		KD (nM)	∆H (kcal/mol)	∆G (kcal/mol)	-T∆S (kcal/mol)	N (sites)
			inosine Run 1		27.8	-30.1	-10.3	19.8	0.936
			inosine Run 2		11.5	-30.5	-10.8	19.6	0.649
			inosine Run 3		15.6	-29.6	-10.7	19	1.02
			inosine Run 4		16.5	-29.2	-10.6	18.6	0.925
		AVERAGE			17.85	-29.85	-10.6	19.25	0.8825
		SDEV			6.98117	0.568624	0.216025	0.550757	0.161345
		FINAL VALUE			18 ± 7	-30 ± 1	-10,6 ± 0,2	19 ± 1	0,9 ± 0,2
			Filename		KD (nM)	∆H (kcal/mol)	∆G (kcal/mol)	-T∆S (kcal/mol)	N (sites)
			guanosine Run 1		197	-25.1	-9.15	16	0.88
			guanosine Run 2		187	-24.8	-9.18	15.7	1.13
			guanosine Run 3		127	-24.2	-9.41	14.7	1.09
			guanosine Run 4		88.8	-26.6	-9.62	17	1.05
		AVERAGE			149.95	-25.175	-9.34	15.85	1.0375
		SDEV			51.1613	1.02103	0.219848	0.946925	0.109962
		FINAL VALUE			150 ± 51	-25 ± 1	-9,3 ± 0,2	16 ± 1	1,0 ± 0,1
			Filename		KD (nM)	∆H (kcal/mol)	∆G (kcal/mol)	-T∆S (kcal/mol)	N (sites)
			adenosine Run 1		1050	-32	-8.16	23.9	0.914
			adenosine Run 2		1010	-35.2	-8.18	27.1	0.86
			adenosine Run 3		884	-34.1	-8.26	25.8	0.907
			adenosine Run 4		355	-32.4	-8.8	23.6	0.715
		AVERAGE			824.75	-33.425	-8.35	25.1	0.849
		SDEV			321.056	1.49304	0.303095	1.65126	0.092495
		FINAL VALUE			825 ± 321	- 33 ± 2	-8,4 ± 0,3	25 ± 2	0,8 ± 0,1
		Inosine Run 1			Inosine Run 2			Inosine Run 3
		Inosine Run 4
		Guanosine Run 1			Guanosine Run 2			Guanosine Run 3
		Guanosine Run 4
		Adenosine Run 1			Adenosine Run 2			Adenosine Run 3
		Adenosine Run 4
