# Supplementary material for: Purine nucleosides replace cAMP in allosteric regulation of PKA in trypanosomatid pathogens
Source: eLife. 2024 Mar 22;12:RP91040. doi: 10.7554/eLife.91040 (PMC10959531; doi:10.7554/eLife.91040)
Supplement: Figure 1—source data 4. [file elife-91040-fig1-data4.xlsx]

## Sheet: Figure 1-source data 4
	L.donovani PKAR
			Filename		KD (nM)	∆H (kcal/mol)	∆G (kcal/mol)	-T∆S (kcal/mol)	N (sites)
			inosine Run 1		41.5	-21	-10.1	10.9	2.04
			inosine Run 2		59.6	-32.4	-9.86	22.6	1.34
			inosine Run 3		75	-32.6	-9.72	22.9	1.53
		AVERAGE			58.7	-28.6667	-9.89333	18.8	1.63667
		SDEV			16.7681	6.64028	0.19218	6.84324	0.361985
		FINAL VALUE			59 ± 17	-29 ± 7	-9,9 ± 0,2	19 ± 7	1,6 ± 0,4
			Filename		KD (nM)	∆H (kcal/mol)	∆G (kcal/mol)	-T∆S (kcal/mol)	N (sites)
			guanosine Run 1		149	-25.6	-9.31	16.2	1.35
			guanosine Run 2		130	-24	-9.4	14.6	1.33
			guanosine Run 3		239	-17.5	-9.04	8.45	1.94
		AVERAGE			172.667	-22.3667	-9.25	13.0833	1.54
		SDEV			58.2266	4.28991	0.18735	4.09156	0.346554
		FINAL VALUE			173 ± 58	-22 ± 4	-9,3 ± 0,2	13 ± 4	1,5 ± 0,3
			Filename		KD (nM)	∆H (kcal/mol)	∆G (kcal/mol)	-T∆S (kcal/mol)	N (sites)
			adenosine Run 1		1280	-13.7	-8.04	5.67	2.08
			adenosine Run 2		852	-16.4	-8.28	8.11	1.94
			adenosine Run 3		1340	-18.8	-8.01	10.8	2.08
		AVERAGE			1157.33	-16.3	-8.11	8.19333	2.03333
		SDEV			266.123	2.55147	0.147986	2.56602	0.080829
		FINAL VALUE			1157 ± 266	-16,3 ± 2,6	-8,1 ± 0,1	8,2 ± 2,6	2,0 ± 0,1
		Inosine Run 1			Inosine Run 2			Inosine Run 3
		Guanosine Run 1			Guanosine Run 2			Guanosine Run 3
		Adenosine Run 1			Adenosine Run 2			Adenosine Run 3
