# Supplementary material for: Purine nucleosides replace cAMP in allosteric regulation of PKA in trypanosomatid pathogens
Source: eLife. 2024 Mar 22;12:RP91040. doi: 10.7554/eLife.91040 (PMC10959531; doi:10.7554/eLife.91040)
Supplement: Figure 3—figure supplement 1—source data 1. [file elife-91040-fig3-figsupp1-data1.xlsx]

## Sheet: Fig.3-fig. Sup. 1-source data 1
Kinase assays
T.brucei PKAR mutant 1 (E311A, T318R, V319A and E435A,N442R,V443A)																T.brucei PKAR mutant 2 (E311A and E435A)																	T.brucei PKAR mutant 3 (T318V and N442V)
Inosine																Inosine																	Inosine
Run 1					Run 2			Run 3			Run 4					Run 1					Run 2			Run 3			Run 4						Run 1					Run 2			Run 3			Run 4
log [ino] (µM)	U/ml	U/ml	U/ml		log [ino]	U/ml		log [ino]	U/ml		log [ino]	U/ml				log [ino] (µM)	U/ml	U/ml	U/ml		log [ino]	U/ml		log [ino]	U/ml		log [ino]	U/ml					log [ino]	U/ml	U/ml	U/ml		log [ino]	U/ml		log [ino]	U/ml		log [ino]	U/ml
3.30103		0.318	0.328													3	2.853	3.335	2.825														1	0.025	0.027	0.028
3	0.313	0.289	0.314													2.69897	2.707	3.187	2.871														0.5	0.023	0.026	0.026
2.69897	0.292	0.308	0.295													2.39794	2.428	2.826	2.745														0.25	0.027	0.028	0.026
2.39794	0.273	0.244	0.254													2.09691	2.464	2.561	2.562														0.125	0.03	0.024	0.024
2.09691	0.26	0.26	0.27													1.79588	2.218	2.269	2.334														0.0625	0.029	0.029	0.027
1.79588	0.246	0.234	0.254													1.49485	1.816	1.75	1.773														0.03125	0.027	0.024	0.026
1.49485	0.228	0.232	0.228													1.19382	1.283	1.265	1.369														0.015625	0.02	0.019	0.022
1.19396	0.209	0.217	0.225													0.89279	0.872	0.739	0.888														0.0078125	0.015	0.017	0.016
0.892651	0.229	0.227	0.216													0.59176	0.659	0.572	0.566														0.00390625	0.012	0.012	0.012
0.592177	0.229	0.217	0.213													0.29073	0.522	0.507	0.486														0.00195312	0.01	0.011	0.009
																-0.0103	0.482	0.467	0.483														0.000976562	0.01	0.012	0.009
Guanosine
Run 1					Run 2			Run 3			Run 4					cAMP
log [guano] (µM)	U/ml	U/ml	U/ml		log [guano]	U/ml		log [guano]	U/ml		log [guano]	U/ml
3.69897	1.414	1.49	1.493													Run 1					Run 2			Run 3			Run 4
3.22185	1.578	1.544	1.505													log [cAMP] (µM)	U/ml	U/ml	U/ml		log [cAMP] (µM)	U/ml		log [cAMP]	U/ml		log [cAMP]	U/ml
2.74473	1.54	1.491	1.511													3.30103	0.326	0.375	0.343		2.30103	0.306	0.302	0.32
2.26762	1.287	1.119	1.251													2.30103	0.418	0.402	0.373		1.69897	0.335	0.342	0.307
1.7905	1.245	1.309	1.301													1.30103	0.409	0.382	0.442		1.09691	0.345	0.366	0.309
1.31345	1.283	1.301	1.126													0.30103	0.384	0.444	0.407		0.495544	0.364	0.352	0.334
0.836324	1.329	1.331	1.276													-0.69897	0.406	0.398	0.435		-0.107905	0.316	0.361	0.347
0.359835	1.25	1.29	1.272													-1.69897	0.379	0.418	0.401		-0.69897	0.368	0.361	0.352
-0.119186	1.2	1.264	1.065													-2.69897	0.364	0.337	0.374		-1.30103	0.39	0.374	0.364
																					-2	0.384	0.336	0.372
Adenosine
Run 1					Run 2			Run 3			Run 4
log [adeno] (µM)	U/ml	U/ml	U/ml		log [adeno]	U/ml		log [adeno]	U/ml		log [adeno]	U/ml				cIMP
3.69897	0.113	0.109	0.109
3.09691	0.287	0.288	0.288													Run 1					Run 2			Run 3			Run 4
2.49485	0.616	0.61	0.589													log [cIMP] (µM)	U/ml	U/ml	U/ml		log [cIMP]	U/ml		log [cIMP]	U/ml		log [cIMP]	U/ml
1.89282	0.965	0.952	1.031													2	0.447	0.434	0.41
1.2907	1.039	1.168	1.15													1.39794	0.426	0.425	0.481
0.68842	1.203	1.169	1.028													0.79588	0.399	0.416	0.448
0.0863598	1.205	1.246	1.164													0.193959	0.401	0.428	0.4
-0.508638	1.232	1.254	1.111													-0.407823	0.423	0.33	0.427
-1.09691	1.271	1.257	1.12													-1.00877	0.393	0.416	0.418
																-1.61979	0.399	0.427	0.339
																-2.22185	0.368	0.375	0.418
cAMP
Run 1					Run 2			Run 3			Run 4
log [cAMP] (µM)	U/ml	U/ml	U/ml		log [cAMP] (µM)	U/ml	U/ml	U/ml		log [cAMP] (µM)	U/ml	U/ml	U/ml
2.52287	0.948	0.951	0.89		2	0.021	0.022	0.024		2.82393	1.62	2.065	1.864
2.04575	0.996	0.91	0.927		1.69897	0.022	0.022	0.019		2.34674	1.91	2.077	2.057
1.56867	0.711	0.715	0.692		1.39794	0.019	0.016	0.019		1.86982	1.842	1.765	1.79
1.09167	0.603	0.599	0.596		1.09691	0.019	0.017	0.016		1.3927	1.431	1.578	1.588
0.614897	0.494	0.473	0.536		0.79588	0.018	0.016	0.02		0.913814	1.313	1.377	1.5
0.136721	0.497	0.489	0.487		0.49485	0.023	0.018	0.018		0.431364	1.432	1.349	1.418
-0.337242	0.487	0.447	0.47		0.19382	0.018	0.017	0.016		-0.0457575	1.41	1.352	1.183
-0.823909	0.455	0.499	0.451		-0.10721	0.016	0.018	0.014		-0.522879	1.264	1.334	1.317
-1.30103	0.452	0.482	0.495
cIMP
Run 1					Run 2			Run 3			Run 4
log [cIMP] (µM)	U/ml				log [cIMP]	U/ml		log [cIMP]	U/ml		log [cIMP]	U/ml
2		0.019	0.02
1.39794	0.018	0.021	0.02
0.79588	0.018	0.02	0.021
0.193959	0.02	0.021	0.02
-0.407823	0.017	0.017	0.016
-1.00877	0.013	0.012	0.011
-1.61979	0.014	0.014	0.012
-2.22185	0.012	0.014	0.012
T.brucei PKAR mutant 4 (T318R and N442R)
																T.brucei PKAR mutant 5(E311A, T318R and E435A,N442R)
Inosine
																Inosine
Run 1					Run 2			Run 3			Run 4
log [ino] (µM)	U/ml	U/ml	U/ml		log [ino]	U/ml		log [ino]	U/ml		log [ino]	U/ml				Run 1					Run 2			Run 3			Run 4
-0.10721	0.847	0.942	1.001													log [ino] (µM)	U/ml	U/ml	U/ml		log [ino]	U/ml		log [ino]	U/ml		log [ino]	U/ml
-0.40824	0.924	0.903	1.068
-0.70927	0.823	1.069	1.008													3	0.782	0.873	0.915
-1.0103	0.82	0.886	0.873													2.69897	0.866		0.801
-1.31133	0.659	0.7	0.717													2.39794	0.874	0.821	0.779
-1.61236	0.509	0.479	0.525													2.09691	0.851	0.775	0.833
-1.91339	0.38	0.393	0.396													1.79588	0.766	0.778	0.79
-2.21442	0.318	0.342	0.327													1.49485	0.657	0.664	0.609
-2.51545	0.292	0.289	0.292													1.19382	0.481	0.447	0.472
-2.81648	0.279	0.271	0.263													0.89279	0.3	0.344	0.294
-3.11751	0.265	0.214	0.251													0.59176	0.219	0.227	0.206
																0.29073	0.185	0.179	0.168
																-0.0103	0.164	0.15	0.167
cAMP
																cAMP
Run 1					Run 2			Run 3			Run 4
log [cAMP] (µM)	U/ml	U/ml	U/ml		log [cAMP] (µM)	U/ml		log [cAMP]	U/ml		log [cAMP]	U/ml				Run 1					Run 2			Run 3			Run 4
3.30103	0.234	0.258	0.229		2.30103	0.196	0.244	0.231								log [cAMP] (µM)	U/ml	U/ml	U/ml		log [cAMP]	U/ml		log [cAMP]	U/ml		log [cAMP]	U/ml
2.30103	0.269	0.267	0.293		1.69897	0.268	0.216	0.202
1.30103	0.247	0.259	0.251		1.09691	0.223	0.204	0.224								3	0.48	0.448	0.467
0.30103	0.245	0.245	0.25		0.495544	0.25	0.228	0.237								2.69897	0.465	0.531	0.548
-0.69897	0.237	0.257	0.237		-0.107905	0.222	0.221	0.238								2.39794	0.443	0.457	0.421
-1.69897	0.234	0.246	0.252		-0.69897	0.224	0.263	0.241								2.09691	0.356	0.373	0.392
-2.69897	0.236	0.219	0.247		-1.30103	0.237	0.241	0.253								1.79588	0.297	0.286	0.307
					-2	0.228	0.226	0.267								1.49485	0.264	0.263	0.243
																1.19382	0.212	0.213	0.19
																0.89279	0.206	0.199	0.189
																0.59176	0.181	0.187	0.184
																0.29073	0.182	0.184	0.188
cIMP
																cIMP
Run 1					Run 2			Run 3			Run 4
log [cIMP] (µM)	U/ml	U/ml	U/ml		log [cIMP]	U/ml		log [cIMP]	U/ml		log [cIMP]	U/ml				Run 1					Run 2			Run 3			Run 4
2	0.921		1.022													log [cIMP] (µM)	U/ml				log [cIMP]	U/ml		log [cIMP]	U/ml		log [cIMP]	U/ml
1.39794	0.66	0.663	0.621													2	1.282	1.284	1.315
0.79588	0.296	0.297	0.276													1.39794	1.404	1.472	1.498
0.193959	0.275	0.271	0.264													0.79588	1.548	1.48	1.473
-0.407823	0.249	0.252	0.304													0.193959	1.457	1.344	1.375
-1.00877	0.286	0.272	0.239													-0.407823	0.699	0.713	0.764
-1.61979	0.278	0.302	0.284													-1.00877	0.376	0.432	0.468
-2.22185	0.268	0.282	0.262													-1.61979	0.373	0.349	0.368
																-2.22185	0.351	0.384	0.347
T.brucei PKAR mutant 6 (E311A, T318R, V319A)																T.brucei PKAR mutant 7(E435A,N442R,V443A)
Inosine																Inosine
Run 1					Run 2			Run 3			Run 4					Run 1					Run 2			Run 3			Run 4
log [ino] (µM)	U/ml	U/ml	U/ml		log [ino]	U/ml		log [ino]	U/ml		log [ino]	U/ml				log [ino] (µM)	U/ml	U/ml	U/ml
2	0.239	0.252	0.281													2	0.04	0.04	0.04
1.30103	0.265	0.284	0.25													1.3	0.04	0.04	0.04
0.60206	0.28	0.269	0.293													0.6	0.03	0.04	0.04
-0.09691	0.251	0.262	0.263													-0.1	0.02	0.02	0.02
-0.79588	0.124	0.145	0.154													-0.8	0.02	0.01	0.02
-1.49485	0.082	0.075	0.072													-1.49	0.01	0.01	0.02
-2.22185	0.061	0.062	0.061													-2.22	0.01	0.01	0.01
-3	0.046	0.048	0.055													-3	0.01	0.02	0.01
Guanosine																Guanosine
Run 1					Run 2			Run 3			Run 4					Run 1					Run 2			Run 3			Run 4
log [guano] (µM)	U/ml	U/ml	U/ml		log [guano]	U/ml		log [guano]	U/ml		log [guano]	U/ml				log [guano] (µM)	U/ml	U/ml	U/ml
1.47712	0.094	0.088	0.102													3.69897	0.098	0.124	0.135
1	0.095	0.1	0.105													3.22185	0.142	0.121	0.133
0.522879	0.098	0.086	0.091													2.74473	0.126	0.143	0.128
0.0457575	0.079	0.075	0.076													2.26762	0.116	0.125	0.106
-0.431364	0.067	0.076	0.074													1.7905	0.102	0.11	0.095
-0.908485	0.074	0.062	0.063													1.31345	0.069	0.065	0.066
-1.38561	0.068	0.057	0.069													0.836324	0.035	0.029	0.037
-1.86273	0.066	0.059	0.065													0.359835	0.023	0.02	0.018
-2.33985	0.059	0.064	0.058													-0.119186	0.014	0.018	0.014
Adenosine																Adenosine
Run 1					Run 2			Run 3			Run 4					Run 1					Run 2			Run 3			Run 4
log [adeno] (µM)	U/ml	U/ml	U/ml		log [adeno]	U/ml		log [adeno]	U/ml		log [adeno]	U/ml				log [adeno] (µM)	U/ml	U/ml	U/ml
3.7	0.02	0.02	0.02													3.09691	0.051	0.051	0.054
3.1	0.03	0.03	0.03													2.49485	0.068	0.069	0.077
2.49	0.06	0.05	0.05													1.89282	0.059	0.058	0.058
1.89	0.06	0.05	0.06													1.2907	0.034	0.036	0.037
1.29	0.06	0.05	0.05													0.68842	0.021	0.02	0.022
0.69	0.06	0.06	0.06													0.0863598	0.017	0.016	0.017
0.09	0.05	0.06	0.07													-0.508638	0.015	0.014	0.013
-0.51	0.06	0.06	0.06													-1.09691	0.013	0.01	0.013
-1.1	0.06	0.06	0.06
cAMP																cAMP
Run 1					Run 2			Run 3			Run 4					Run 1					Run 2			Run 3			Run 4
log [cAMP] (µM)	U/ml	U/ml	U/ml		log [cAMP] (µM)	U/ml	U/ml	U/ml								log [cAMP] (µM)	U/ml	U/ml	U/ml		log [cAMP] (µM)	U/ml	U/ml	U/ml
2.30103	0.182	0.196	0.195		3.30103	0.094	0.099	0.117								3.3	0.01	0.01	0.01		2.3	0.01	0.01	0.01
1.69897	0.157	0.149	0.156		2.82393	0.121	0.133	0.149								2.82	0.01	0.01	0.01		1.7	0.01	0.01	0.01
1.09691	0.108	0.089	0.095		2.34674	0.124	0.129	0.112								2.35	0.01	0.01	0.01		1.1	0.01	0.01	0.01
0.495544	0.067	0.061	0.07		1.86982	0.104	0.105	0.119								1.87	0.01	0.01	0.02		0.5	0.01	0.01	0.01
-0.107905	0.04	0.043	0.046		1.3927	0.087	0.094	0.08								1.39	0.02	0.01	0.02		-0.11	0.01	0.01	0.01
-0.69897	0.045	0.039	0.046		0.913814	0.077		0.064								0.91	0.01	0.02	0.01		-0.7	0.01	0.01	0.01
-1.30103	0.039	0.042	0.039		0.431364	0.066	0.064	0.065								0.43	0.01	0.01	0.01		-1.3	0.01	0.02	0.01
-2	0.045	0.041	0.041		-0.0457575	0.064	0.057	0.07								-0.05	0.01	0.01	0.02		-2	0.02	0.02	0.02
					-0.522879	0.063	0.064	0.063								-0.52	0.01	0.01	0.02
cIMP																cIMP
Run 1					Run 2			Run 3			Run 4					Run 1					Run 2			Run 3			Run 4
log [cIMP] (µM)	U/ml				log [cIMP]	U/ml		log [cIMP]	U/ml		log [cIMP]	U/ml				log [cIMP] (µM)	U/ml	U/ml	U/ml
2	0.261	0.298	0.33													2	0.033	0.032	0.037
1.39794	0.204	0.247	0.249													1.39794	0.029	0.035	0.032
0.79588	0.119	0.122	0.135													0.79588	0.025	0.025	0.022
0.193959	0.075	0.072	0.082													0.193959	0.019	0.018	0.018
-0.407823	0.048	0.059	0.055													-0.407823	0.015	0.013	0.016
-1.00877	0.051	0.05	0.055													-1.00877	0.014	0.015	0.015
-1.61979	0.046	0.055	0.045													-1.61979	0.017	0.016	0.017
-2.22185	0.052	0.042	0.049													-2.22185	0.014	0.015	0.015
