# Supplementary material for: Purine nucleosides replace cAMP in allosteric regulation of PKA in trypanosomatid pathogens
Source: eLife. 2024 Mar 22;12:RP91040. doi: 10.7554/eLife.91040 (PMC10959531; doi:10.7554/eLife.91040)
Supplement: Figure 4—source data 1. [file elife-91040-fig4-data1.xlsx]

## Sheet: Figure 4-source data1
	Isothermal titration calorimetry (ITC)
		T.brucei PKAR 199-499 mutant 8: E311A, T318R, V319A , Y484A, Y485A
				Filename		KD (nM)	∆H (kcal/mol)	∆G (kcal/mol)	-T∆S (kcal/mol)	N (sites)
				inosine Run 1		1610	-20.7	-7.91	12.8	0.682
				inosine Run 2		1460	-22.7	-7.96	14.7	0.47
				inosine Run 3		1360	-22.2	-8	14.2	0.493
			AVERAGE			1476.67	-21.8667	-7.95667	13.9	0.548333
			SDEV			125.831	1.04083	0.0450925	0.984886	0.116329
			FINAL VALUE			1476 ± 125	-22 ± 1.0	-7,96 ± 0,05	14 ± 1	0,55 ± 0,12
		ino run1				ino run2			ino run 3
