# Supplementary material for: Purine nucleosides replace cAMP in allosteric regulation of PKA in trypanosomatid pathogens
Source: eLife. 2024 Mar 22;12:RP91040. doi: 10.7554/eLife.91040 (PMC10959531; doi:10.7554/eLife.91040)
Supplement: Figure 4—source data 2. [file elife-91040-fig4-data2.xlsx]

## Sheet: Figure 4-source data 2
			T.brucei PKAR 199-499: E311A, T318R, V319A (mutant 6)
					Filename		KD (nM)	∆H (kcal/mol)	∆G (kcal/mol)	-T∆S (kcal/mol)	N (sites)
					inosine Run 1		6.17	-30.9	-11.2	19.7	0.578
					inosine Run 2		19.9	-30.5	-10.5	20	0.472
					inosine Run 3		23.6	-29.9	-10.4	19.5	0.454
					inosine Run 4		30.4	-28.9	-10.3	18.7	0.419
					inosine Run 5		11.5	-27.3	-10.8	16.4	0.519
				AVERAGE			18.314	-29.5	-10.64	18.86	0.4884
				SDEV			9.62336	1.44222	0.364692	1.45705	0.0617114
				FINAL VALUE			18 ± 10	-29,5 ± 1,4	-10,6 ± 0,4	18,9 ± 1,5	0,5 ± 0,1
					Filename		KD (nM)	∆H (kcal/mol)	∆G (kcal/mol)	-T∆S (kcal/mol)	N (sites)
					guanosine Run 1		3.94	-24.5	-11.5	13	0.727
					guanosine Run 2		9.79	-26.9	-10.9	16	0.547
					guanosine Run 3		3.96	-27.8	-11.5	16.3	0.676
					guanosine Run 4		6.22	-27.7	-11.2	16.5	0.688
				AVERAGE			5.9775	-26.725	-11.275	15.45	0.6595
				SDEV			2.75776	1.53704	0.287228	1.64621	0.0780961
				FINAL VALUE			6 ± 3	-26,7 ± 1,5	-11,3 ± 0,3	15,5 ± 1,6	0,7 ± 0,1
					Filename		KD (nM)	∆H (kcal/mol)	∆G (kcal/mol)	-T∆S (kcal/mol)	N (sites)
					adenosine Run 1		1170	-29.9	-8.09	21.8	0.597
					adenosine Run 2		960	-23.8	-8.21	15.5	0.603
					adenosine Run 3		895	-24	-8.25	15.7	0.647
					adenosine Run 4		1350	-27.6	-8.01	19.6	0.464
				AVERAGE			1093.75	-26.325	-8.14	18.15	0.57775
				SDEV			207.259	2.95452	0.110151	3.0795	0.0790417
				FINAL VALUE			1,1 ± 0,2	-26,3 ± 3.0	-8,1 ± 0.1	18.2 ± 3.1	0.6 ± 0.1
		Inosine Run 1					Inosine Run 2		Inosine Run 3		Inosine Run 4			Inosine Run 5
		Guanosine Run 1					Guanosine Run 2		Guanosine Run 3		Guanosine Run 4
		Adenosine Run 1					Adenosine Run 2		Adenosine Run 3		Adenosine Run 4
