# Supplementary material for: Purine nucleosides replace cAMP in allosteric regulation of PKA in trypanosomatid pathogens
Source: eLife. 2024 Mar 22;12:RP91040. doi: 10.7554/eLife.91040 (PMC10959531; doi:10.7554/eLife.91040)
Supplement: Figure 4—source data 3. [file elife-91040-fig4-data3.xlsx]

## Sheet: Figure 4-source data 3
	T.brucei PKAR 199-499: E435A, N442R, V443A (mutant 7)
			Filename			KD (nM)		∆H (kcal/mol)		∆G (kcal/mol)		-T∆S (kcal/mol)		N (sites)
			Inosine Run 1			8.23		-24.6		-11		13.5		0.516
			Inosine Run 2			4.83		-25.6		-11.3		14.2		0.547
			Inosine Run 3			13.2		-22.5		-10.8		11.8		0.748
		AVERAGE				8.75333		-24.2333		-11.0333		13.1667		0.603667
		SDEV				4.20947		1.58219		0.251661		1.23423		0.125954
		FINAL VALUE				8,75 ± 4.2		-24.2 ± 1.58		-11 ± 0,25		13,2 ± 1,2		0,6 ± 0,1
			Filename			KD (nM)		∆H (kcal/mol)		∆G (kcal/mol)		-T∆S (kcal/mol)		N (sites)
			Guanosine Run 1			256		-17.2		-8.99		8.16		0.617
			Guanosine Run 2			199		-15		-9.14		5.9		0.797
			Guanosine Run 3			228		-18.4		-9.06		9.32		0.761
			Guanosine Run 4			199		-17.2		-9.14		8.03		0.638
		AVERAGE				220.5		-16.95		-9.0825		7.8525		0.70325
		SDEV				27.3313		1.41774		0.0722842		1.425		0.0891081
		FINAL VALUE				221 ± 27		-17 ± 1,4		-9.1 ± 0.1		7,9 ± 1,4		0,7 ± 0.1
			Filename			KD (nM)		∆H (kcal/mol)		∆G (kcal/mol)		-T∆S (kcal/mol)		N (sites)
			Adenosine Run 1			81.6		-26.8		-9.67		17.1		0.512
			Adenosine Run 2			93.3		-26.5		-9.59		16.9		0.515
			Adenosine Run 3			71.4		-26.3		-9.75		16.6		0.638
		AVERAGE				82.1		-26.5333		-9.67		16.8667		0.555
		SDEV				10.9586		0.251661		0.08		0.251661		0.0718958
		FINAL VALUE				82 ± 11		-26,5 ± 0.3		-9,7 ± 0.1		17 ± 0.3		0.6 ± 0.1
		Inosine Run 1				Inosine Run 2				Inosine Run 3
		Guanosine Run 1				Guanosine Run 2				Guanosine Run 3				Guanosine Run 4
		Adenosine Run 1				Adenosine Run 2				Adenosine Run 3
