# Supplementary material for: Purine nucleosides replace cAMP in allosteric regulation of PKA in trypanosomatid pathogens
Source: eLife. 2024 Mar 22;12:RP91040. doi: 10.7554/eLife.91040 (PMC10959531; doi:10.7554/eLife.91040)
Supplement: Figure 5—source data 1. [file elife-91040-fig5-data1.xlsx]

## Sheet: Figure 5-source data 1
Kinase assays
								T.brucei PKAR
Adenosine					Adenosine	in 10 nM Guanosine				Adenosine					Adenosine	in 10 nM Guanosine
Run 1					Run 1					Run 2					Run 2
	Replicate 1	Replicate 2	Replicate 3			Replicate 1	Replicate 2	Replicate 3			Replicate 1	Replicate 2	Replicate 3			Replicate 1	Replicate 2	Replicate 3
log [adeno] µM	U/ml	U/ml	U/ml		log [adeno] (µM)	U/ml	U/ml	U/ml		log [adeno] (µM)	U/ml	U/ml	U/ml		log [adeno] (µM)	U/ml	U/ml	U/ml
1.69897	0.024	0.026	0.021		1	0.024	0.028	0.029		1.60206	0.031	0.033	0.032		0.39794	0.038	0.036	0.033
1.22194	0.021	0.026	0.023		0.522835	0.026	0.026	0.024		1.30103	0.038	0.038	0.04		0.09691	0.037	0.039	0.033
0.745075	0.015	0.017	0.019		0.0457141	0.022	0.02	0.02		1	0.036	0.038			-0.20412	0.032	0.031	0.036
0.267172	0.013	0.011	0.012		-0.431798	0.016	0.016	0.017		0.69897	0.024	0.025	0.024		-0.50515	0.028	0.027	0.023
-0.207608	0.009	0.01	0.009		-0.910095	0.011	0.012	0.011		0.39794	0.025	0.022	0.021		-0.80618	0.022	0.021	0.029
-0.677781	0.008	0.007	0.009		-1.38722	0.009	0.011	0.014		0.09691	0.016	0.016	0.014		-1.10721	0.016	0.023	0.019
-1.1549	0.006	0.008	0.007		-1.85387	0.009	0.009	0.008		-0.20412	0.014	0.014	0.014		-1.40824	0.017	0.016	0.017
					-2.30103	0.009	0.008	0.008		-0.50515		0.014	0.014		-1.70927	0.013	0.013	0.016
					-2.69897	0.008	0.008	0.008
Adenosine					Adenosine	in 20 nM Guanosine
Run 1					Run 1
	Replicate 1	Replicate 2	Replicate 3			Replicate 1	Replicate 2	Replicate 3
log [adeno] (µM)	U/ml	U/ml	U/ml		log [adeno] (µM)	U/ml	U/ml	U/ml
1.77815	0.02	0.021	0.016		1.17609	0.023	0.023	0.024
1.30103	0.017	0.021	0.019		0.69897	0.022	0.021	0.023
0.824126	0.015	0.016	0.013		0.221936	0.022	0.022	0.017
0.346353	0.011	0.011	0.011		-0.254925	0.018	0.019	0.019
-0.130768	0.009	0.008	0.008		-0.732828	0.017	0.015	0.013
-0.60206	0.009	0.007	0.007		-1.20761	0.011	0.01	0.01
-1.09691	0.008	0.009	0.008		-1.67778	0.009	0.01	0.01
					-2.1549	0.009	0.009	0.009
					-2.69897	0.007	0.008	0.008
